# Supplementary material for: Staphylococcus spp. Isolated from Bovine Subclinical Mastitis in Different Regions of Brazil: Molecular Typing and Biofilm Gene Expression Analysis by RT-qPCR
Source: PubMed Central journal article supplement (PMC7764751; doi:10.3390/antibiotics9120888), 2020-12-10
Supplement: antibiotics-09-00888-s001.pdf [file antibiotics-09-00888-s001.pdf]

**Table S1. Brazilian state of origin (Minas Gerais – MG; Pernambuco - PE; Paraná – PR; Rio Grande do Sul – RS; Santa Catarina – SC), identification number of the farm, geographic coordinates, number of the isolate, cluster, and sequence type (ST).**

| State | Number of farm | Latitude  | Longitude | Isolate | Cluster | ST  |
|-------|----------------|-----------|-----------|---------|---------|-----|
| MG    | 1              | -29.37184 | -51.87331 | 1       | CSE4    | 59  |
| MG    | 2              | -29.37184 | -52.07478 | 2       | CSA1    | 126 |
| MG    | 1              | -29.37184 | -52.07478 | 3       |         |     |
| MG    | 1              | -29.37184 | -52.07478 | 4       |         |     |
| PR    | 16             | -9.16839  | -36.68521 | 5       |         |     |
| PR    | 12             | -8.65609  | -36.32987 | 6       | CSC1    |     |
| PR    | 14             | -9.08953  | -36.63096 | 7       |         |     |
| PR    | 14             | -26.05670 | -53.36940 | 8       |         |     |
| PR    | 10             | -27.00000 | -53.00000 | 9       | CSE2    |     |
| PR    | 13             | -22.00000 | -44.00000 | 10      | CSE2    |     |
| PR    | 17             | -22.08636 | -43.82967 | 11      | CSE2    | 48  |
| PR    | 11             | -22.00000 | -44.00000 | 12      | CSA2    |     |
| PR    | 18             | -22.00000 | -44.00000 | 13      | CSA2    | 1   |
| PR    | 15             | -25.99030 | -53.65860 | 14      | CSE3    |     |
| PR    | 9              | -25.79830 | -53.56970 | 15      | CSA2    |     |
| PR    | 15             | -25.56750 | -53.84330 | 16      | CSE3    | 575 |
| PR    | 13             | -25.56750 | -53.84330 | 17      |         |     |
| PR    | 6              | -25.67544 | -53.54374 | 18      | CSA2    |     |
| PR    | 8              | -25.66894 | -53.81517 | 19      |         |     |
| PR    | 11             | -25.96030 | -53.69420 | 20      |         |     |
| PR    | 18             | -25.72953 | -53.71555 | 21      | CSE3    |     |
| PR    | 9              | -26.05940 | -53.36000 | 22      | CSA2    |     |
| PR    | 6              | -26.05670 | -53.36940 | 23      |         |     |
| PR    | 7              | -25.84890 | -53.77420 | 24      | CSA5    | 1   |

|    |    |           |           |    |      |     |
|----|----|-----------|-----------|----|------|-----|
| PR | 7  | -26.05670 | -53.36940 | 25 | CSA5 |     |
| PR | 12 | -25.66894 | -53.81517 | 26 |      |     |
| PR | 12 | -25.92110 | -53.50500 | 27 | CSA5 |     |
| PR | 10 | -25.72953 | -53.54374 | 28 | CSA2 |     |
| PR | 9  | -25.72953 | -53.71555 | 29 | CSA2 |     |
| PR | 9  | 26.05940  | -53.36000 | 30 |      |     |
| SC | 34 | -25.84890 | -53.77420 | 31 |      |     |
| SC | 35 | -25.92110 | -53.50500 | 32 | CSA4 |     |
| SC | 27 | -25.96030 | -53.69420 | 33 | CSA4 |     |
| SC | 31 | -25.96030 | -53.69420 | 34 | CSA3 |     |
| SC | 31 | -25.79830 | -53.56970 | 35 | CSA3 |     |
| SC | 29 | -25.79830 | -53.56970 | 36 | CSA3 |     |
| SC | 29 | -25.67544 | -53.54374 | 37 | CSA3 |     |
| SC | 31 | -25.84890 | -53.77420 | 38 | CSA4 |     |
| SC | 29 | -25.84890 | -53.77420 | 39 | CSA3 |     |
| SC | 25 | -53.00000 | -27.00000 | 40 | CSA2 | 1   |
| SC | 26 | -26.87511 | -52.40419 | 41 | CSA6 |     |
| SC | 25 | -53.00000 | -27.00000 | 42 | CSA2 |     |
| SC | 35 | -27.00000 | -53.00000 | 43 | CSA4 | 746 |
| SC | 35 | -27.00000 | -53.00000 | 44 |      |     |
| SC | 25 | -26.72670 | -52.72446 | 45 |      |     |
| SC | 32 | -26.72670 | -52.72446 | 46 |      |     |
| SC | 30 | -27.00000 | -53.00000 | 47 |      |     |
| SC | 30 | -26.72670 | -52.72446 | 48 | CSC3 |     |
| SC | 30 | -26.95589 | -52.53599 | 49 |      |     |
| SC | 26 | -27.00000 | -53.00000 | 50 | CSC2 |     |
| SC | 26 | -26.95589 | -52.53599 | 51 | CSE1 |     |
| SC | 33 | -26.87511 | -52.40419 | 52 |      |     |

|    |    |           |           |    |      |     |
|----|----|-----------|-----------|----|------|-----|
| SC | 33 | -26.87511 | -52.40419 | 53 |      |     |
| SC | 33 | -26.95589 | -52.53599 | 54 | CSA3 | 188 |
| SC | 33 | -27.00000 | -53.00000 | 55 | CSC2 |     |
| SC | 33 | -26.58749 | -53.58534 | 56 | CSA6 |     |
| SC | 34 | -26.58749 | -53.58534 | 57 |      |     |
| SC | 25 | -26.58749 | -53.58534 | 58 |      |     |
| SC | 25 | -27.00000 | -53.00000 | 59 |      |     |
| SC | 25 | -27.00000 | -53.00000 | 60 |      |     |
| SC | 28 | -26.72670 | -52.72446 | 61 |      |     |
| SC | 32 | -26.72670 | -52.72446 | 62 |      |     |
| SC | 32 | -26.72670 | -52.72446 | 63 |      |     |
| SC | 26 | -26.72670 | -52.72446 | 64 |      |     |
| SC | 35 | -26.72670 | -52.72446 | 65 | CSC1 |     |
| SC | 32 | -53.00000 | -27.00000 | 66 | CSC1 |     |
| SC | 30 | -26.95589 | -52.53599 | 67 | CSA6 |     |
| SC | 31 | -26.95589 | -52.53599 | 68 |      |     |
| SC | 31 | -26.95589 | -52.53599 | 69 |      |     |
| SC | 33 | -26.85790 | -52.56528 | 70 | CSC1 |     |
| SC | 34 | -27.00000 | -53.00000 | 71 | CSA6 | 8   |
| SC | 30 | -27.00000 | -53.00000 | 72 | CSC3 |     |
| SC | 30 | -27.00000 | -53.00000 | 73 |      |     |
| SC | 26 | -26.87511 | -52.40419 | 74 | CSC2 |     |
| SC | 31 | -27.00000 | -53.00000 | 75 | CSE3 | 81  |
| SC | 31 | -27.00000 | -54.00000 | 76 | CSC2 |     |
| SC | 31 | -27.00000 | -53.00000 | 77 |      |     |
| SC | 33 | -27.00000 | -53.00000 | 78 | CSE1 |     |
| SC | 33 | -26.72670 | -52.72446 | 79 | CSA2 |     |
| SC | 33 | -53.00000 | -27.00000 | 80 | CSC2 |     |

|    |    |           |           |     |      |     |
|----|----|-----------|-----------|-----|------|-----|
| SC | 34 | -27.00000 | -54.00000 | 81  | CSE1 | 639 |
| SC | 32 | -27.00000 | -54.00000 | 83  |      |     |
| SC | 32 | -27.00000 | -53.00000 | 85  | CSE4 |     |
| SC | 32 | -27.00000 | -53.00000 | 86  |      |     |
| SC | 33 | -27.00000 | -53.00000 | 87  |      |     |
| SP | 39 | -27.00000 | -53.00000 | 88  | CSA1 | 126 |
| SP | 39 | -26.72670 | -52.72446 | 89  | CSA1 |     |
| SP | 39 | -26.72670 | -52.72446 | 90  | CSA1 |     |
| SP | 39 | -26.72670 | -52.72446 | 91  | CSA1 | 126 |
| SP | 39 | -53.00000 | -27.00000 | 92  | CSA1 |     |
| SP | 39 | -27.00000 | -53.00000 | 93  | CSA1 |     |
| SP | 39 | -27.00000 | -53.00000 | 94  | CSA1 |     |
| SP | 46 | -27.00000 | -53.00000 | 96  |      |     |
| SP | 41 | -26.72670 | -52.72446 | 98  | CSS1 |     |
| SP | 41 | -22.10793 | -4719743  | 99  | CSS1 |     |
| SP | 44 | -22.10793 | -4719743  | 100 | CSC3 |     |
| SP | 44 | -22.10793 | -4719743  | 102 | CSC2 |     |
| SP | 38 | -22.10793 | -4719743  | 103 |      |     |
| SP | 38 | -22.10793 | -4719743  | 105 | CSS1 |     |
| SP | 47 | -22.10793 | -4719743  | 106 |      |     |
| SP | 47 | -22.10793 | -47.19743 | 107 |      |     |
| SP | 47 | -21.57330 | -47.27147 | 108 | CSC2 |     |
| SP | 47 | -22.03783 | -47.31533 | 109 | CSC2 |     |
| SP | 47 | -22.03783 | -47.31533 | 110 |      |     |
| SP | 44 | -22.08642 | -47.30266 | 111 | CSA1 |     |
| SP | 44 | -22.08642 | -47.30266 | 112 |      |     |
| SP | 42 | -22.02294 | -47.21954 | 113 |      |     |
| SP | 45 | -22.02294 | -47.21954 | 114 | CSA4 |     |

|    |    |           |           |     |      |  |
|----|----|-----------|-----------|-----|------|--|
| SP | 36 | -22.03558 | -47.21020 | 115 | CSA1 |  |
| SP | 36 | -22.03558 | -47.21020 | 116 | CSA1 |  |
| SP | 36 | -22.03558 | -47.21020 | 117 | CSA1 |  |
| SP | 46 | -22.03558 | -47.21020 | 118 |      |  |
| SP | 40 | -22.03558 | -47.21020 | 119 |      |  |
| SP | 40 | -22.08642 | -47.30266 | 121 |      |  |
| SP | 36 | -22.08642 | -47.30266 | 122 | CSA1 |  |
| SP | 36 | -21.59518 | -47.36216 | 123 | CSA1 |  |
| SP | 36 | -22.11392 | -47.27687 | 124 | CSA1 |  |
| SP | 36 | -21.47006 | -47.19743 | 125 | CSA1 |  |
| SP | 36 | -21.47006 | -47.19743 | 126 | CSA1 |  |
| SP | 43 | -21.47006 | -47.19743 | 127 | CSA1 |  |
| SP | 43 | -21.57330 | -47.27147 | 128 | CSA1 |  |
| SP | 43 | -22.01764 | -47.35078 | 129 | CSA1 |  |
| SP | 43 | -22.01764 | -47.35078 | 130 | CSA1 |  |
| SP | 43 | -21.47006 | -47.19743 | 131 | CSA1 |  |
| SP | 39 | -21.47006 | -47.19743 | 132 |      |  |
| SP | 36 | -21.47006 | -47.19743 | 133 | CSA1 |  |
| SP | 36 | -21.47006 | -47.19743 | 134 | CSA1 |  |
| SP | 36 | -21.47006 | -47.19743 | 135 | CSA1 |  |
| SP | 44 | -21.99696 | -47.42619 | 136 | CSA1 |  |
| SP | 47 | -21.99696 | -47.42619 | 137 | CSA2 |  |
| SP | 44 | -21.99696 | -47.42619 | 138 |      |  |
| SP | 48 | -21.99696 | -47.42619 | 139 |      |  |
| SP | 44 | -21.99696 | -47.42619 | 140 |      |  |
| SP | 44 | -22.10793 | -47.19743 | 141 |      |  |
| SP | 46 | -21.47006 | -47.19743 | 142 | CSC2 |  |
| SP | 46 | -21.47006 | -47.19743 | 143 | CSC1 |  |

|    |    |           |           |     |      |     |
|----|----|-----------|-----------|-----|------|-----|
| SP | 46 | -21.47006 | -47.19743 | 144 | CSC2 |     |
| SP | 47 | -22.08642 | -47.30266 | 146 |      |     |
| SP | 36 | -22.03558 | -47.21020 | 147 | CSA1 |     |
| SP | 36 | -22.08642 | -47.30266 | 148 | CSA1 |     |
| SP | 37 | -21.52129 | -47.40640 | 149 | CSA1 |     |
| SP | 43 | -22.08642 | -47.30266 | 150 | CSA1 |     |
| SP | 43 | -22.08642 | -47.30266 | 151 | CSA1 |     |
| SP | 43 | -21.57330 | -47.27147 | 152 | CSA1 |     |
| SP | 46 | -21.57330 | -47.27147 | 153 | CSC2 |     |
| SP | 44 | -21.57330 | -47.27147 | 154 |      |     |
| SP | 36 | -22.03558 | -47.21020 | 155 | CSC1 |     |
| SP | 43 | -21.47006 | -47.19743 | 156 | CSA1 |     |
| SP | 43 | -21.47006 | -47.19743 | 157 | CSC3 |     |
| SP | 43 | -21.97077 | -46.79473 | 159 |      |     |
| SP | 43 | -21.99606 | -47.42619 | 160 |      |     |
| SP | 43 | -21.99606 | -47.42619 | 161 |      |     |
| SP | 46 | -21.99606 | -47.42619 | 162 |      |     |
| SP | 46 | -21.57330 | -47.27147 | 163 |      |     |
| RS | 19 | -22.08642 | -47.30266 | 164 |      |     |
| RS | 22 | -21.47006 | -47.19743 | 165 |      |     |
| RS | 24 | -21.99606 | -47.42619 | 166 | CSA4 |     |
| RS | 24 | -21.99606 | -47.42619 | 167 |      |     |
| RS | 20 | -21.99606 | -47.42619 | 168 |      |     |
| RS | 20 | -21.99606 | -47.42619 | 169 | CSA4 |     |
| RS | 23 | -21.99606 | -47.42619 | 170 | CSA4 | 746 |
| RS | 23 | -21.57330 | -47.27147 | 171 |      |     |
| RS | 21 | -21.57330 | -47.27147 | 172 |      |     |
| RS | 21 | -29.21467 | -52.02655 | 173 |      |     |

|    |    |           |           |     |      |   |
|----|----|-----------|-----------|-----|------|---|
| RS | 21 | -29.21467 | -52.02655 | 174 |      |   |
| PE | 3  | -29.23571 | -51.86962 | 175 |      |   |
| PE | 4  | -29.23571 | -51.86962 | 176 |      |   |
| PE | 5  | -28.96995 | -52.01067 | 177 |      |   |
| PR | 15 | -28.96995 | -52.01067 | 178 | CSA2 | 1 |
| SC | 32 | -29.37184 | -51.87331 | 181 |      |   |

CSA: cluster *Staphylococcus aureus*; CSC: cluster *Staphylococcus chromogenes*; CSE: cluster *Staphylococcus epidermidis*; CSS: cluster *Staphylococcus saprophyticus*; CSI: Cluster *Staphylococcus simulans*.
